# Supplementary material
Source: PubMed Central journal article supplement (PMC3838024)
Supplement: JCM.02298-13_zjm999092993so1.pdf [file JCM.02298-13_zjm999092993so1.pdf]

**Scatter plot**

**Residual plot**

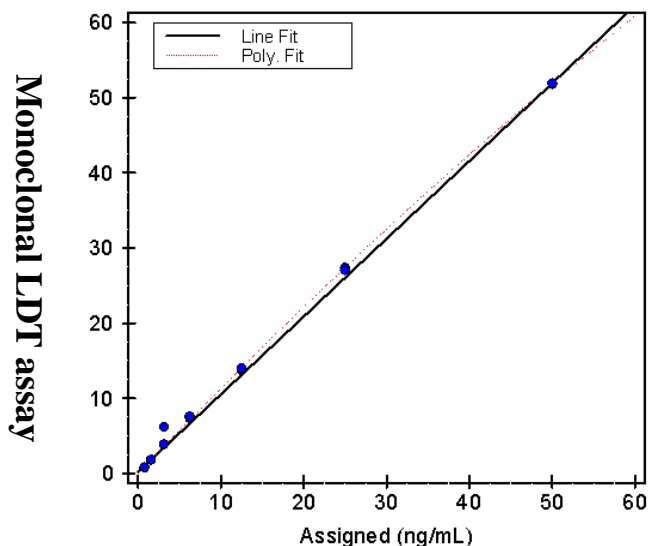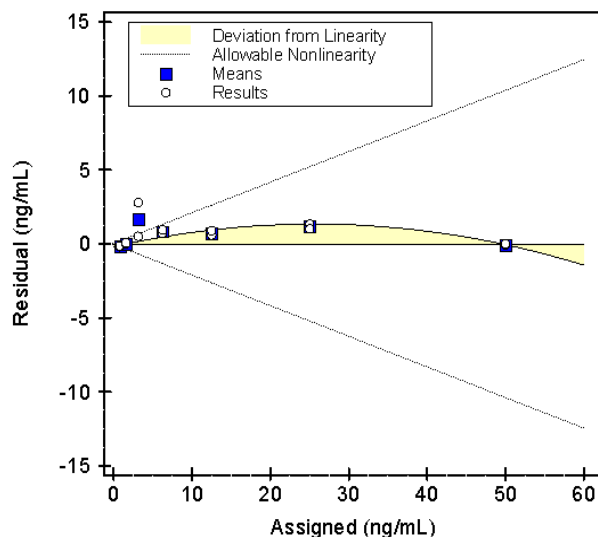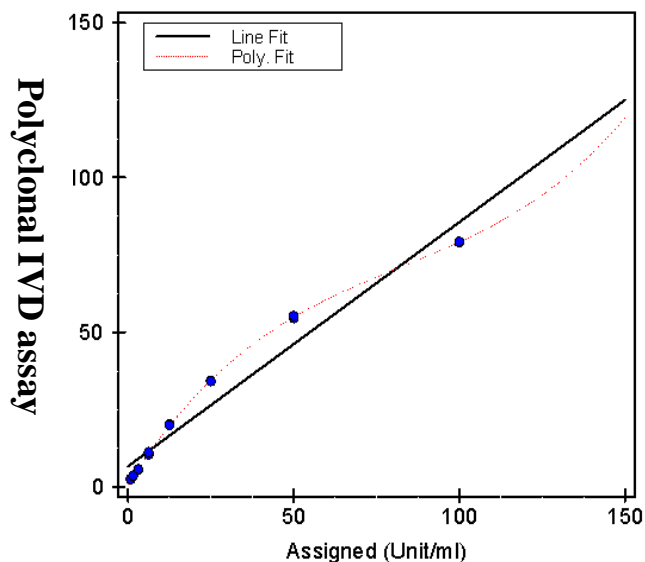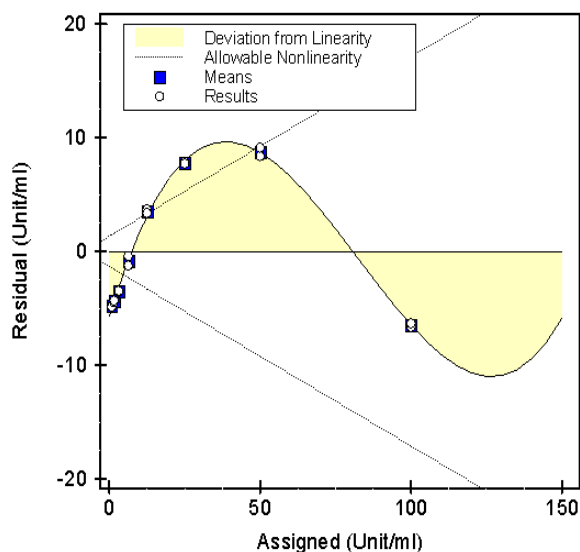

**Supplemental figure 1: Linearity of the monoclonal LDT and polyclonal IVD assays for quantitation of urinary histoplasma antigen.** Linearity was evaluated at 7 concentration levels. The monoclonal LDT was linear within the range 0.5 -50 ng/mL. The polyclonal IVD was not linear within the analytical measurement range (2-100U/mL ) with allowable nonlinearity of 20%.
